# Supplementary material for: Exogenous p-Coumaric Acid Improves Salvia hispanica L. Seedling Shoot Growth
Source: MDPI journal article supplement (doi:10.3390/plants8120546), 2019-11-26
Supplement: s1 [file s1]

# Supplementary data

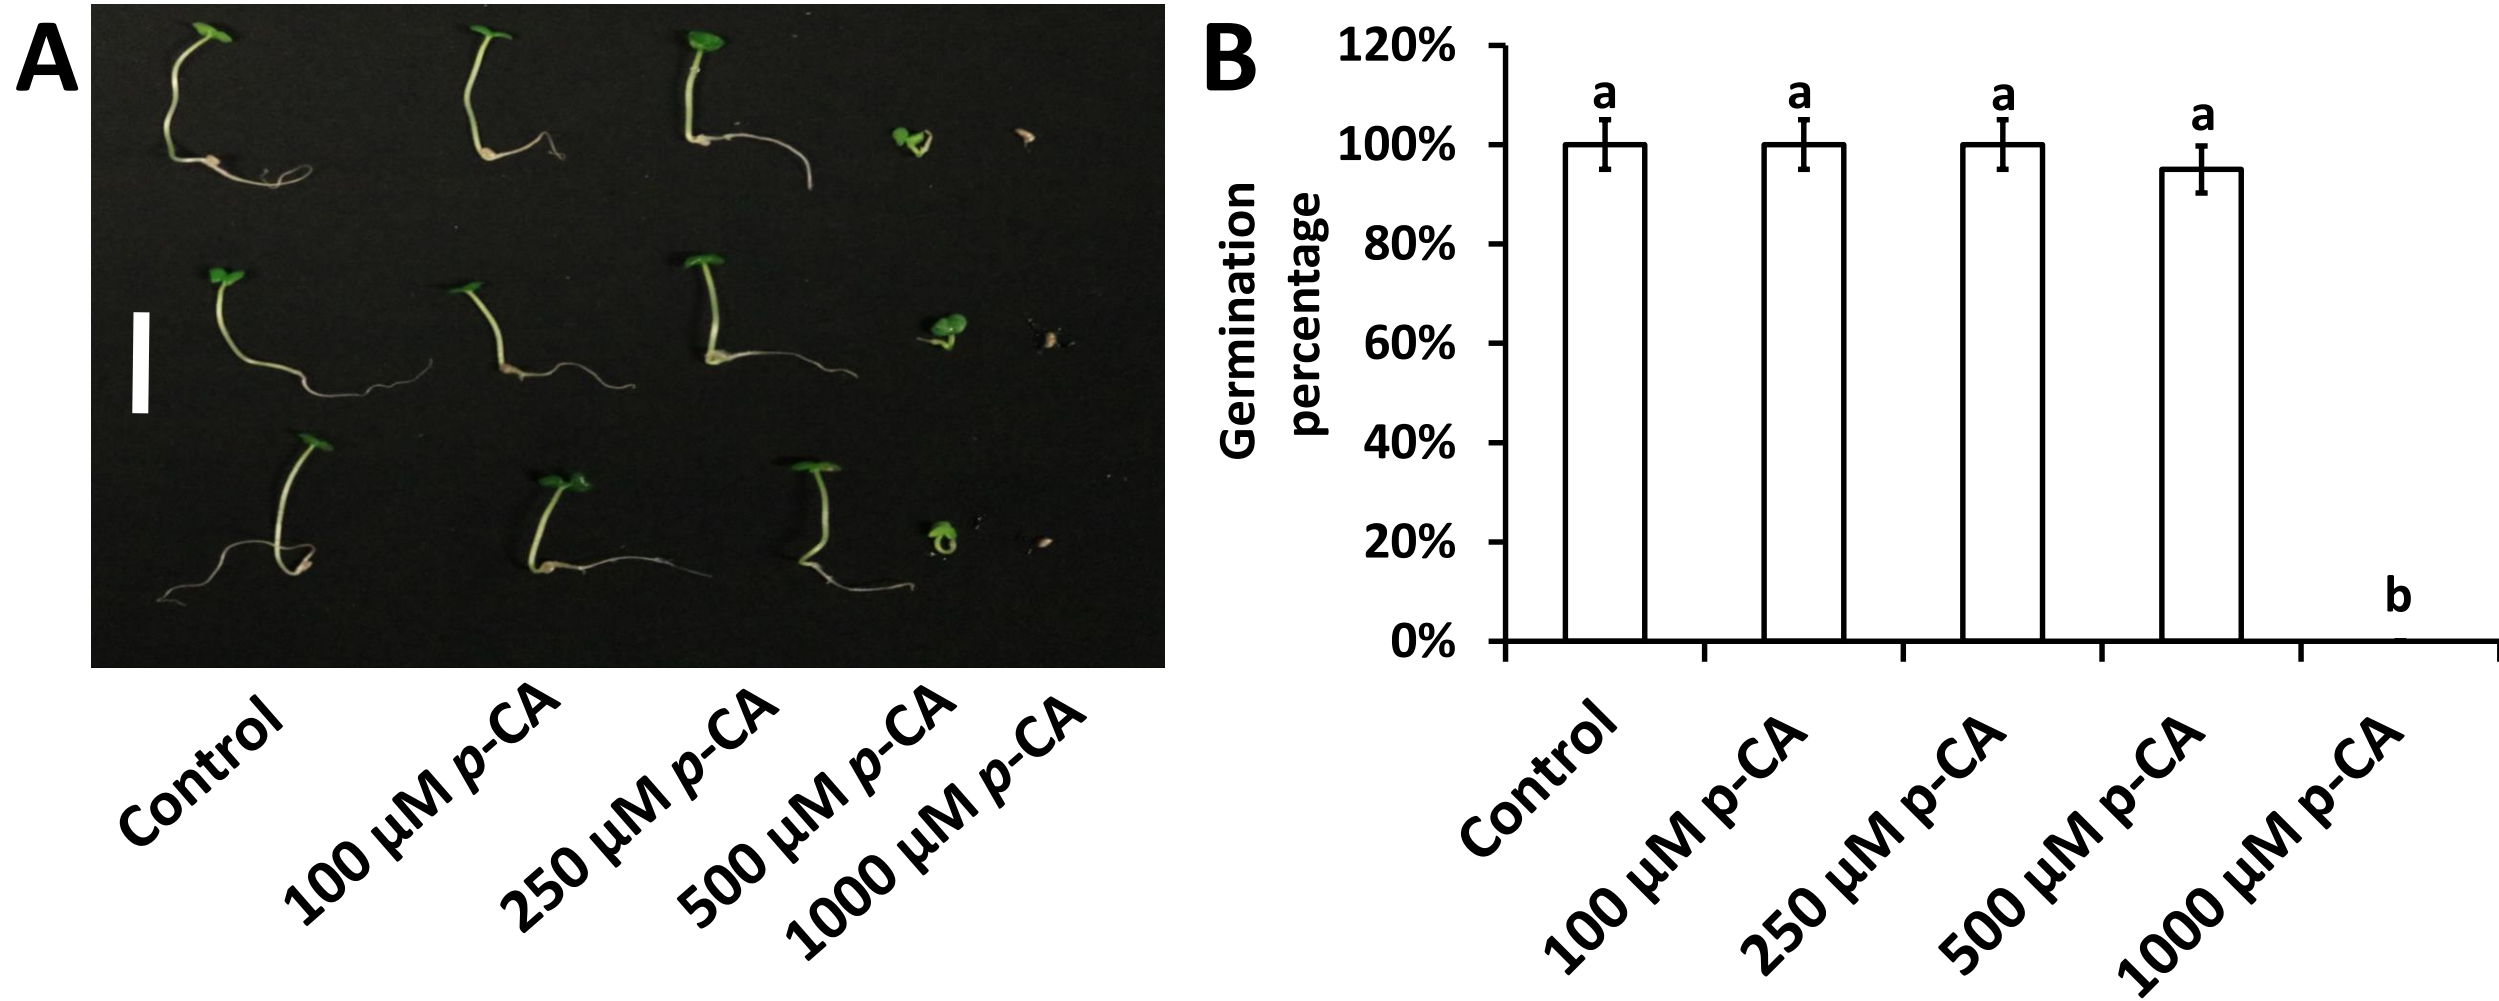

Supplementary Figure S1. Concentration-dependant germination of chia seedlings. The white bar = 2 cm (A). Data represent the means ( $\pm$  SE) of three independent experiments and different letters indicate the mean values that are significantly different at  $p < 0.05$  using the Tukey-Kramer test.

## **Supplementary method:**

### *Evaluation of seed germination*

Chia (*Salvia hispanica* L) seeds (50 seeds per treatment) were germinated on half strength Murashige and Skoog (MS) basal media supplemented with different concentrations of *p*-coumaric acid (100  $\mu$ M, 250  $\mu$ M, 500  $\mu$ M and 1000  $\mu$ M) or without *p*-coumaric acid (control group) in the dark for a period of five days. The seed germination percentage for each treatment (in triplicate) was scored after five days using the following formula:

$$\text{Seed germination \%} = (\text{number of seeds germinated}) / (\text{number of seeds per treatment}) \times 100$$

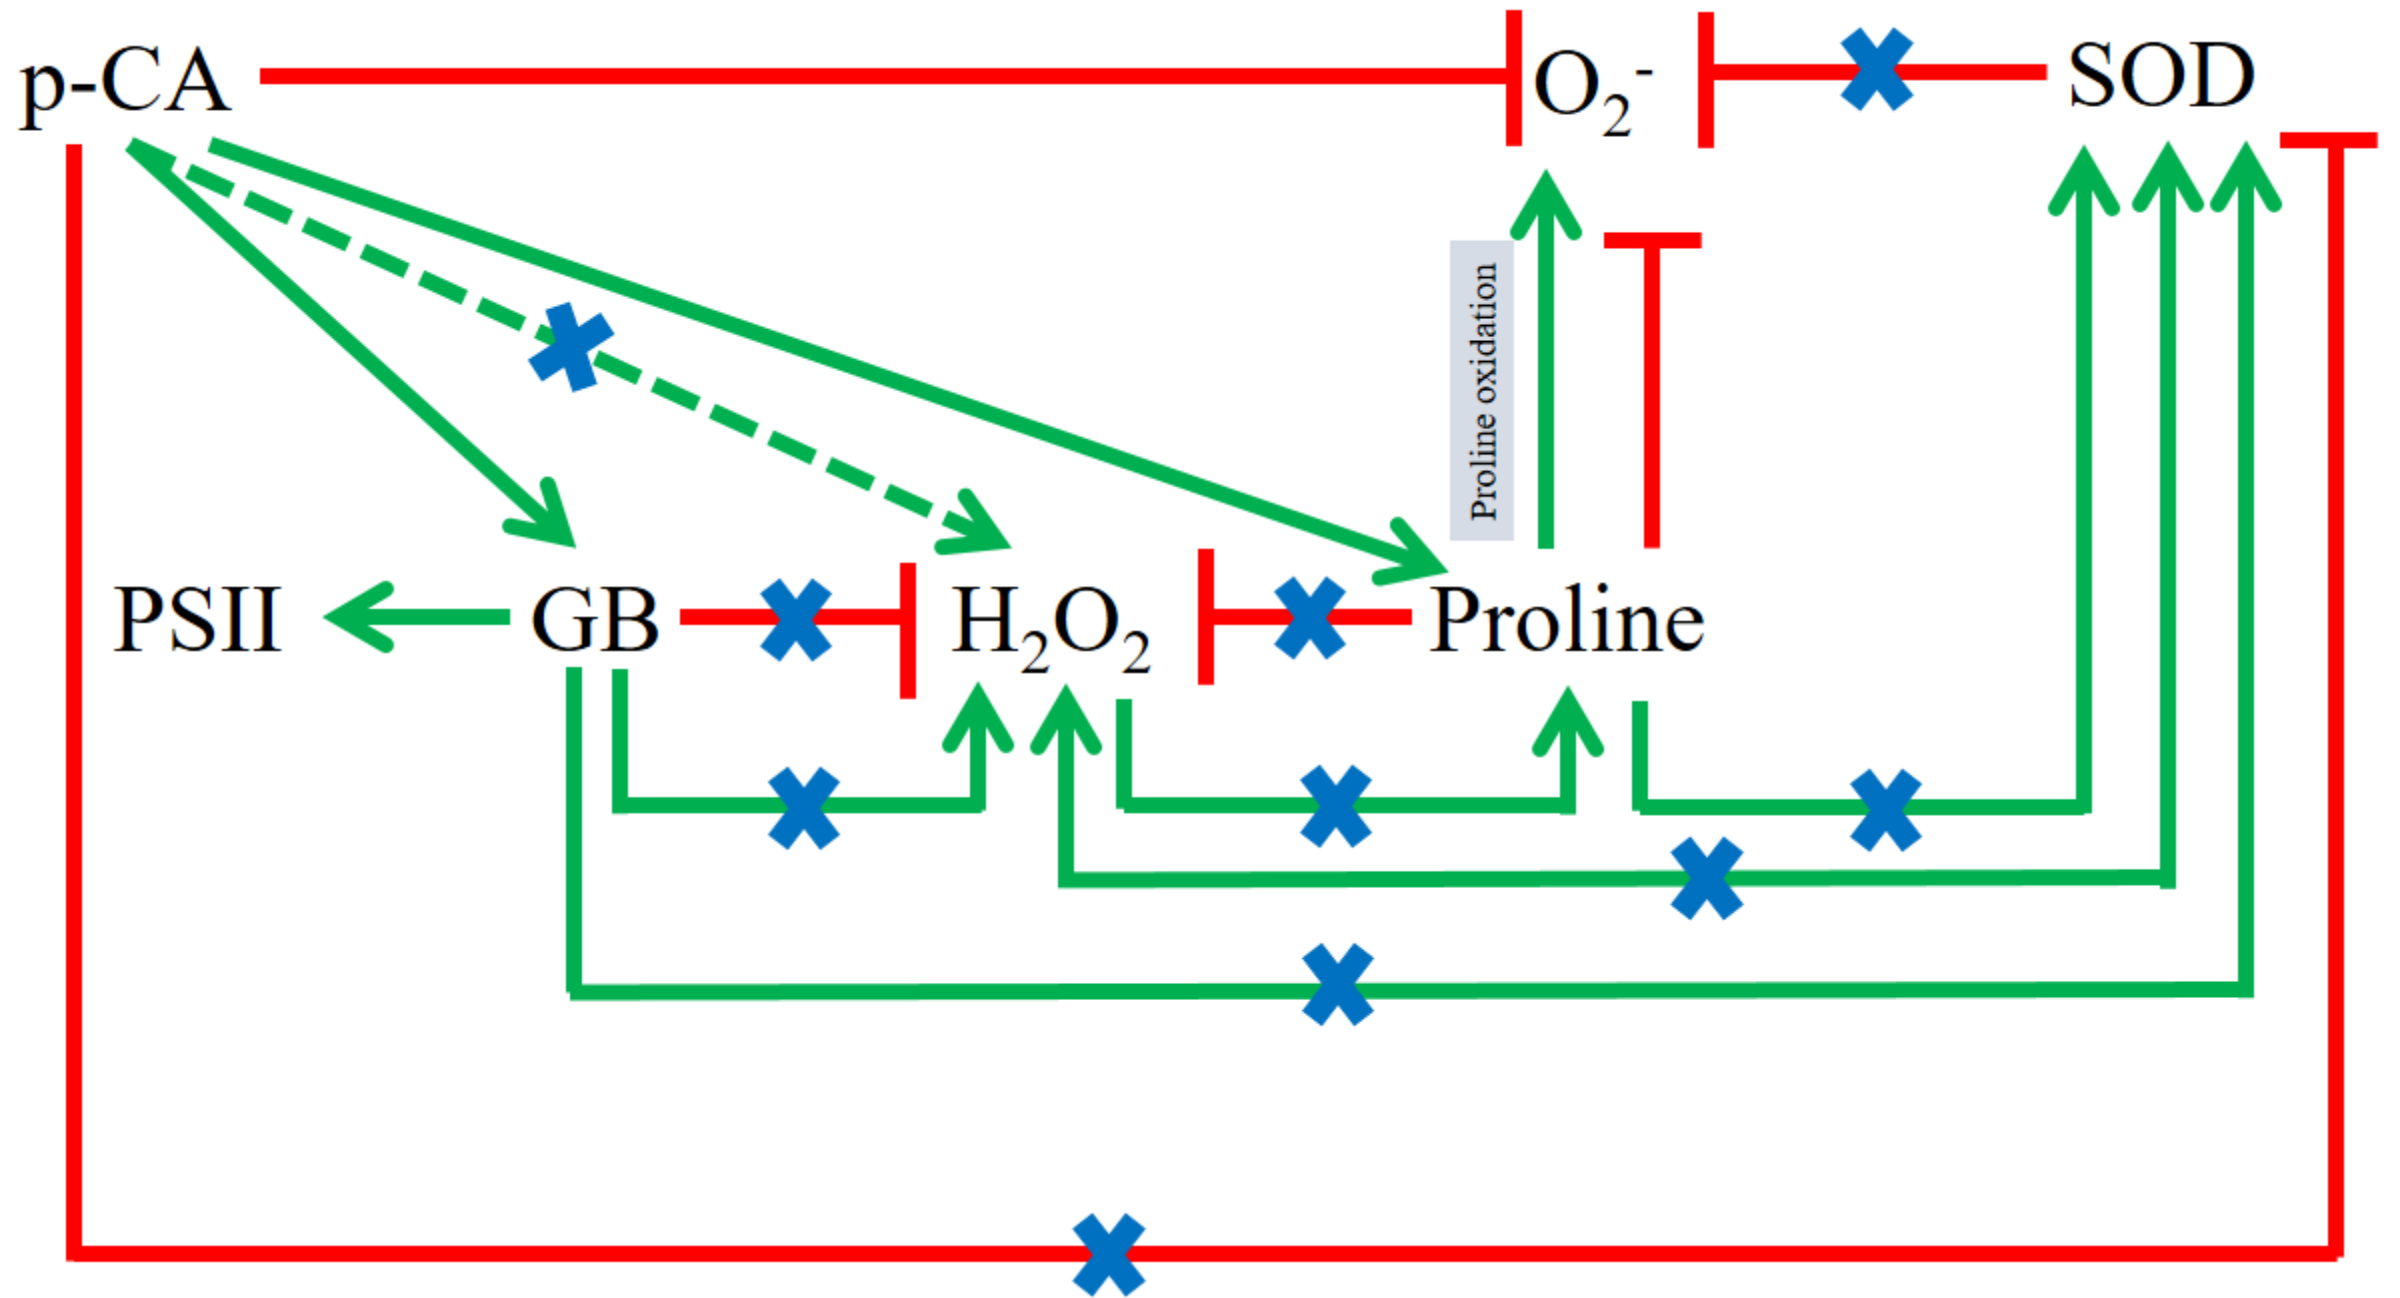

Supplementary Figure S2. Schematic model of *p*-CA signalling in chia seedlings. Inhibition or scavenging (red lines). Activation or increase (green lines). Indirect activation or indirect increase (dashed green line). Did not occur in this study (blue crosses).
